# Supplementary material
Source: HighWire-hosted journal article supplement (https://bmjopensem.bmj.com/content/9/2/e001570)
Supplement: inline-supplementary-material-1 [file inline-supplementary-material-1.pdf]

Supplementary Table 1 Components and Dutch dietary guidelines of the DHD15-index and their threshold (minimum score) and cut-off (maximum score)

| Components                               | Component type | Dutch dietary guidelines 2015                                                                                    | Minimum score (=0)                                                                   | Maximum score (=10)                                                                    |
|------------------------------------------|----------------|------------------------------------------------------------------------------------------------------------------|--------------------------------------------------------------------------------------|----------------------------------------------------------------------------------------|
| 1. Vegetables                            | A              | Eat at least 200 grams of vegetables daily.                                                                      | 0g/day                                                                               | ≥200 g/day                                                                             |
| 2. Fruit                                 | A              | Eat at least 200 grams of fruit daily.                                                                           | 0 g/day                                                                              | ≥200 g/day                                                                             |
| 3. Wholegrain products*                  | A              | a. Eat at least 90 grams of wholegrain products daily.                                                           | 0 g/day                                                                              | ≥90 g/day                                                                              |
|                                          | R              | b. Replace refined grain products with wholegrain products.                                                      | No consumption of wholegrain products<br>OR<br>ratio wholegrain/refined grains ≤ 0.7 | No consumption of refined grain products<br>OR<br>ratio wholegrain/refined grains ≥ 11 |
| 4. Legumes                               | A              | Eat legumes weekly.                                                                                              | 0 g/day                                                                              | ≥10 g/day                                                                              |
| 5. Nuts                                  | A              | Eat at least 15 grams of unsalted nuts daily.                                                                    | 0 g/day                                                                              | ≥ 15 g/day                                                                             |
| 6. Dairy†                                | O              | Eat a few portions of dairy products daily, including milk or yoghurt.                                           | 0 g/day OR ≥750 g/day                                                                | 300-450 g/day                                                                          |
| 7. Fish‡                                 | A              | Eat one serving of fish weekly, preferably oily fish.                                                            | 0 g/day                                                                              | ≥15 g/day                                                                              |
| 8. Tea                                   | A              | Drink three cups of black or green tea daily.                                                                    | 0 g/day                                                                              | ≥450 g/day                                                                             |
| 9. Fats and oils                         | R              | Replace butter, hard margarines, and cooking fats with soft margarines, liquid cooking fats, and vegetable oils. | No consumption of soft margarines, liquid cooking fats, and vegetable oils           | No consumption of butter, hard margarines, and cooking fats                            |
|                                          |                |                                                                                                                  | OR<br>ratio liquid cooking fats/solid cooking fats ≤ 0.6                             | OR<br>ratio liquid cooking fats/solid cooking fats ≥ 13                                |
| 10. Coffee                               | Q              | Replace unfiltered coffee with filtered coffee.                                                                  | Any consumption of unfiltered coffee                                                 | Consumption of only filtered coffee<br>OR<br>no coffee consumption                     |
| 11. Red meat                             | M              | Limit consumption of red meat.                                                                                   | ≥100 g/day                                                                           | ≤45 g/day                                                                              |
| 12. Processed meat                       | M              | Limit consumption of processed meat.                                                                             | ≥50 g/day                                                                            | 0 g/day                                                                                |
| 13. Sweetened beverages and fruit juices | M              | Limit consumption of sweetened beverages and fruit juices.                                                       | ≥250 g/day                                                                           | 0 g/day                                                                                |
| 14. Alcohol                              | M              | If alcohol is consumed, intake should be limited to one Dutch unit (10 grams of ethanol) daily.                  | Women: ≥ 20 g ethanol/day<br>Men: ≥30 g ethanol/day                                  | Women: ≤10 g ethanol/day<br>Men: ≤10 g ethanol/day                                     |
| 15. Salt                                 | M              | Limit consumption of table salt to 6 grams daily.                                                                | ≥ 3.8 g sodium/day                                                                   | ≤ 1.9 g sodium/day                                                                     |
| 16. Unhealthy choices                    | M              | Limit consumption of unhealthy choices                                                                           | > 7 choices/week                                                                     | ≤ 3 choices/week                                                                       |

Abbreviations: A, adequacy component; M, moderation component; O, optimum component; Q, qualitative component; R, ratio component.

Adequacy components are derived from a guideline that recommends increasing intake. Moderation components are derived from a guideline that recommends limiting intake. Dairy is an optimum component based on an optimal range of intakes, whereas coffee is a qualitative component based on the type of coffee. Ratio components are based on the ratio of intake of healthy and unhealthy products in that food group.

\* This component consists of two subcomponents (a and b). Each subcomponent has a maximum score of 5 points.

† maximum of 40g cheese can be included.

‡ maximum of 4g lean fish can be included.
