# Supplementary material
Source: HighWire-hosted journal article supplement (https://bmjopensem.bmj.com/content/9/2/e001570)
Supplement: inline-supplementary-material-2 [file inline-supplementary-material-2.pdf]

Supplementary Table 2 Personal characteristics and running characteristics in the total study population, and for men and women separately

|                                                    | <b>Total<br/>(n=1993)<sup>†</sup></b> | <b>Men<br/>(n=891)</b> | <b>Women<br/>(n=1095)</b> | <b>p-value<br/>men vs<br/>women*</b> | <b>Missing<br/>(n)</b> |
|----------------------------------------------------|---------------------------------------|------------------------|---------------------------|--------------------------------------|------------------------|
| Age, years                                         | 44 (34 – 54)                          | 48 (37 – 57)           | 43 (32 – 52)              | <b>&lt;0.001</b>                     |                        |
| BMI, kg/m <sup>2</sup>                             | 22.3 (20.8 – 23.9)                    | 22.8 (21.5 – 24.4)     | 21.6 (20.2 – 23.4)        | <b>&lt;0.001</b>                     | 10                     |
| Running level                                      |                                       |                        |                           | <b>&lt;0.001</b>                     |                        |
| beginner                                           | 53 (3)                                | 16 (2)                 | 37 (3)                    |                                      |                        |
| intermediate, not competitive                      | 1513 (76)                             | 618 (69)               | 890 (81)                  |                                      |                        |
| competitive (in age group)                         | 414 (21)                              | 250 (28)               | 162 (15)                  |                                      |                        |
| (semi)professional                                 | 13 (1)                                | 7 (1)                  | 6 (1)                     |                                      |                        |
| Running years                                      |                                       |                        |                           | <b>&lt;0.001</b>                     | 3                      |
| < 1 year                                           | 41 (2)                                | 12 (1)                 | 29 (3)                    |                                      |                        |
| 1-2 years                                          | 155 (8)                               | 62 (7)                 | 93 (9)                    |                                      |                        |
| 3-5 years                                          | 394 (20)                              | 153 (17)               | 239 (22)                  |                                      |                        |
| 6-9 years                                          | 418 (21)                              | 180 (20)               | 238 (22)                  |                                      |                        |
| ≥ 10 years                                         | 982 (49)                              | 481 (54)               | 496 (45)                  |                                      |                        |
| Running, times/week                                | 3.0 (2.0 – 4.0)                       | 3.0 (2.5 – 4.0)        | 3.0 (2.0 – 3.0)           | <b>&lt;0.001</b>                     | 1                      |
| Running, km/week                                   | 30 (20 – 42)                          | 35 (25 – 50)           | 25 (17 – 40)              | <b>&lt;0.001</b>                     | 5                      |
| Longest distance per week (km)                     | 15 (10 – 20)                          | 16 (12 – 21)           | 12 (10 – 17)              | <b>&lt;0.001</b>                     | 166                    |
| Intensity most intensive training                  |                                       |                        |                           | <b>&lt;0.001</b>                     |                        |
| moderately intensive                               | 492 (25)                              | 197 (22)               | 293 (27)                  |                                      |                        |
| intensive                                          | 1019 (51)                             | 442 (50)               | 575 (53)                  |                                      |                        |
| very intensive                                     | 482 (24)                              | 252 (28)               | 227 (21)                  |                                      |                        |
| Running in competitions (yes)                      | 1623 (81)                             | 734 (82)               | 884 (81)                  | 0.330                                | 1                      |
| Km on current shoes                                | 450 (200 – 700)                       | 500 (250 – 700)        | 400 (200 – 650)           | <b>0.016</b>                         | 513                    |
| Main surface                                       |                                       |                        |                           | 0.092                                |                        |
| running track                                      | 23 (1)                                | 8 (1)                  | 15 (1)                    |                                      |                        |
| hard surface                                       | 1154 (58)                             | 535 (60)               | 615 (56)                  |                                      |                        |
| soft surface                                       | 176 (9)                               | 63 (7)                 | 111 (10)                  |                                      |                        |
| treadmill                                          | 5 (0)                                 | 3 (0)                  | 2 (0)                     |                                      |                        |
| various                                            | 635 (32)                              | 282 (32)               | 352 (32)                  |                                      |                        |
| Warming up (yes)                                   | 1266 (64)                             | 569 (64)               | 693 (63)                  | 0.954                                | 2                      |
| Other sports besides running<br>in past year (yes) | 1203 (60)                             | 459 (52)               | 738 (67)                  | <b>&lt;0.001</b>                     | 2                      |
| Other sports besides running<br>(hours per week)   | 3.0 (2.0 – 5.0)                       | 3.0 (2.0 – 5.0)        | 3.0 (2.0 – 5.0)           | <b>0.003</b>                         | 806                    |

Data are presented as median (25<sup>th</sup>-75<sup>th</sup> percentile) for continuous variables, and n (%) for categorical variables.

\* P-values were obtained with a Mann-Whitney U test for continuous variables and a Pearson Chi-square test for categorical variables; statistical significance (p<0.05) is indicated in bold.

<sup>†</sup> The total population includes 5 gender-neutral runners and 2 runners who did not fill in their gender.
