# Supplementary material
Source: HighWire-hosted journal article supplement (https://bmjopensem.bmj.com/content/9/2/e001570)
Supplement: inline-supplementary-material-3 [file inline-supplementary-material-3.pdf]

Supplementary Table 3 Daily energy and nutrient intake in the total study population, and for men and women separately

|                                         | <b>Total<br/>(n=1993)<sup>†</sup></b> | <b>Men<br/>(n=891)</b>          | <b>Women<br/>(n=1095)</b>       | <b>p-value<br/>men vs<br/>women*</b> |
|-----------------------------------------|---------------------------------------|---------------------------------|---------------------------------|--------------------------------------|
| Energy (kcal)                           | 2095 (1700 – 2538)                    | 2365 (1954 -2806)               | 1898 (1574 – 2270)              | <b>&lt;0.001</b>                     |
| Total carbohydrates<br>(g)<br>(En%)     | 229 (184 – 280)<br>44 (41 – 47)       | 259 (209 – 314)<br>44 (41 – 47) | 209 (169 – 251)<br>44 (41 – 48) | <b>&lt;0.001</b><br>0.199            |
| Mono- and disaccharides (g)             | 98 (78 – 122)                         | 103 (79 – 128)                  | 95 (75 – 116)                   | <b>&lt;0.001</b>                     |
| Polysaccharides (g)                     | 129 (99 – 164)                        | 154 (123 – 188)                 | 113 (87 – 142)                  | <b>&lt;0.001</b>                     |
| Total fat<br>(g)<br>(En%)               | 83 (64 – 103)<br>36 (32 – 39)         | 94 (73 – 115)<br>36 (32 – 39)   | 75 (59 – 93)<br>36 (32 – 39)    | <b>&lt;0.001</b><br>0.787            |
| Saturated fatty acids (g)               | 27 (20 – 36)                          | 31 (23 – 39)                    | 25 (19 – 32)                    | <b>&lt;0.001</b>                     |
| Monounsaturated fatty acids (g)         | 30 (24 – 38)                          | 33 (26 – 42)                    | 28 (22 – 35)                    | <b>&lt;0.001</b>                     |
| Polyunsaturated fatty acids (g)         | 17 (13 – 22)                          | 20 (15 – 25)                    | 15 (11 – 20)                    | <b>&lt;0.001</b>                     |
| Alpha-linoleic acid (ALA) (g)           | 1.73 (1.35 – 2.28)                    | 1.95 (1.50 – 2.51)              | 1.60 (1.24 – 2.04)              | <b>&lt;0.001</b>                     |
| Eicosapentaenoic acid (EPA) (g)         | 0.08 (0.04 – 0.13)                    | 0.08 (0.04 – 0.13)              | 0.08 (0.03 – 0.14)              | 0.111                                |
| Docosahexaenoic acid (DHA) (g)          | 0.11 (0.04 – 0.17)                    | 0.10 (0.04 – 0.17)              | 0.11 (0.03 – 0.18)              | 0.437                                |
| Cholesterol (mg)                        | 198 (141 – 270)                       | 217 (156 – 296)                 | 183 (130 – 246)                 | <b>&lt;0.001</b>                     |
| Total protein<br>(g)<br>(En%)           | 76 (63 – 93)<br>15 (13 – 16)          | 87 (72 – 102)<br>15 (13 – 16)   | 70 (57 – 84)<br>15 (13 – 16)    | <b>&lt;0.001</b><br>0.485            |
| Vegetable protein (g)                   | 39 (30 – 49)                          | 44 (35 – 55)                    | 35 (27 – 43)                    | <b>&lt;0.001</b>                     |
| Animal protein (g)                      | 38 (27 – 48)                          | 41 (31 – 53)                    | 35 (25 – 45)                    | <b>&lt;0.001</b>                     |
| Alcohol (g)                             | 4 (1 – 10)                            | 6 (2 – 13)                      | 3 (1 – 8)                       | <b>&lt;0.001</b>                     |
| Fibre (g)                               | 26 (21 – 33)                          | 29 (23 – 36)                    | 24 (19 – 30)                    | <b>&lt;0.001</b>                     |
| Retinol (µg)                            | 377 (243 – 575)                       | 469 (298 – 692)                 | 325 (213 – 468)                 | <b>&lt;0.001</b>                     |
| Retinol equivalents (µg)                | 813 (592 – 1089)                      | 846 (610 – 1141)                | 791 (583 – 1047)                | <b>&lt;0.001</b>                     |
| Vitamin B1 (mg)                         | 1.0 (0.8 – 1.2)                       | 1.1 (0.9 – 1.3)                 | 0.9 (0.7 – 1.0)                 | <b>&lt;0.001</b>                     |
| Vitamin B2 (mg)                         | 1.4 (1.1 – 1.8)                       | 1.6 (1.3 – 2.0)                 | 1.3 (1.1 – 1.6)                 | <b>&lt;0.001</b>                     |
| Vitamin B6 (mg)                         | 1.6 (1.3 – 2.0)                       | 1.8 (1.4 – 2.2)                 | 1.5 (1.2 – 1.8)                 | <b>&lt;0.001</b>                     |
| Folate (present in food by nature) (µg) | 266 (216 – 325)                       | 276 (222 – 340)                 | 260 (211 – 316)                 | <b>&lt;0.001</b>                     |
| Folate equivalents (µg)                 | 288 (230 – 358)                       | 300 (238 – 380)                 | 278 (224 – 342)                 | <b>&lt;0.001</b>                     |
| Vitamin B12 (µg)                        | 3.9 (2.7 – 5.4)                       | 4.2 (3.1 – 5.8)                 | 3.6 (2.5 – 4.9)                 | <b>&lt;0.001</b>                     |
| Vitamin C (mg)                          | 92 (69 – 120)                         | 88 (64 – 118)                   | 94 (73 – 121)                   | <b>&lt;0.001</b>                     |
| Vitamin D (µg)                          | 2.7 (1.9 – 3.9)                       | 3.2 (2.2 – 4.4)                 | 2.4 (1.7 – 3.4)                 | <b>&lt;0.001</b>                     |
| Vitamin E (mg)                          | 14 (11 – 18)                          | 15 (12 – 19)                    | 13 (10 – 16)                    | <b>&lt;0.001</b>                     |
| Calcium (mg)                            | 988 (769 – 1251)                      | 1052 (804 – 1310)               | 938 (732 – 1183)                | <b>&lt;0.001</b>                     |
| Total iron (mg)                         | 12 (10 – 14)                          | 13 (11 – 16)                    | 11 (9 – 13)                     | <b>&lt;0.001</b>                     |
| Haem iron (mg)                          | 0.7 (0.3 – 1.1)                       | 0.8 (0.5 – 1.2)                 | 0.6 (0.3 -1.0)                  | <b>&lt;0.001</b>                     |
| Non haem iron (mg)                      | 11.2 (9.1 – 13.6)                     | 12 (10 – 15)                    | 11 (9 – 13)                     | <b>&lt;0.001</b>                     |
| Magnesium (mg)                          | 388 (314 – 475)                       | 431 (350 – 519)                 | 360 (292 – 435)                 | <b>&lt;0.001</b>                     |
| Zinc (mg)                               | 10 (8 – 12)                           | 11 (10 – 14)                    | 9 (8 – 11)                      | <b>&lt;0.001</b>                     |
| Selenium (µg)                           | 43 (35 – 53)                          | 48 (39 – 57)                    | 40 (32 – 48)                    | <b>&lt;0.001</b>                     |

Data are presented as median (25<sup>th</sup>-75<sup>th</sup> percentile).

\* P-values were obtained with a Mann-Whitney U test; statistical significance (p<0.05) is indicated in bold.

<sup>†</sup> The total population includes 5 gender-neutral runners and 2 runners who did not fill in their gender.
